# Supplementary material for: Stem cell function is conserved during short-term storage of cultured epidermal cell sheets at 12°C
Source: PLoS One. 2020 May 20;15(5):e0232270. doi: 10.1371/journal.pone.0232270 (PMC7239464; doi:10.1371/journal.pone.0232270)
Supplement: S3 Data — (XLSX) [file pone.0232270.s003.xlsx]

## Sheet: Sheet1
	Cells 11-16 p3
	0 days	7 days	11 days	15 days	15+3	15 days inc. CnT	MEM, incubator 15 days
Well 1	1335000	1530000	1335000	915000	1067500	75000	0
Well 2	1605000	1665000	1335000	1020000	805000	105000	0
Well 3	1770000	1665000	1215000	945000	795000	105000	0
Well 4	1770000	1365000	1335000	960000	1170000	120000	0
Well 5	1560000	1620000	1575000	1065000	1290000	185000
Well 6	1445000	1335000	1245000	660000	780000	150000
Average	1.58083e+06	1530000	1340000	927500	984583	123333	0
St. dev	174052	148189	126452	141801	221170	38815.8	0
